# Supplementary material for: Neodymium niobate nanospheres on functionalized carbon nanofibers: a nanoengineering approach for highly sensitive vanillin detection
Source: Royal Society of Chemistry journal article supplement (doi:10.1039/d4nr00521j), 2024-01-01
Supplement: d4nr00521j1.pdf [file d4nr00521j1.pdf]

## Neodymium niobate Nanospheres on Functionalized carbon Nanofibers: A Nanoengineered Approach for Highly Sensitive Vanillin Detection

I. Jenisha Daisy Priscillal, Sea-Fue Wang, <sup>a,\*</sup>

<sup>a</sup>Department of Materials and Mineral Resources Engineering, National Taipei University of Technology, No. 1, Sec. 3, Chung-Hsiao East Rd., Taipei 106, Taiwan.

Corresponding authors:

\*S.-F. Wang, Email: [sfwang@ntut.edu.tw](mailto:sfwang@ntut.edu.tw)

| Entry     | Table of contents                                                                                                                                                                                                                                                                                                                      | Page no.  |
|-----------|----------------------------------------------------------------------------------------------------------------------------------------------------------------------------------------------------------------------------------------------------------------------------------------------------------------------------------------|-----------|
|           | <i>Chemicals and reagents</i>                                                                                                                                                                                                                                                                                                          | <u>S3</u> |
|           | <i>Instrumentations</i>                                                                                                                                                                                                                                                                                                                | <u>S3</u> |
| Figure S1 | (A) EIS spectra obtained for unmodified GCE, NdNbO <sub>4</sub> /GCE, f-CNF/GCE, and NdNbO <sub>4</sub> /f-CNF/GCE; (B) corresponding Randel's equivalent circuit for the EIS Spectra. All the above experiments were performed in [Fe(CN) <sub>6</sub> ] <sup>3-/4-</sup> in 0.1 M KCl as electrolyte.                                | <u>S4</u> |
| Figure S2 | CV profile obtained for unmodified GCE, NdNbO <sub>4</sub> /GCE, f-CNF/GCE, and NdNbO <sub>4</sub> /f-CNF/GCE in [Fe(CN) <sub>6</sub> ] <sup>3-/4-</sup> in 0.1 M KCl as electrolyte.                                                                                                                                                  | <u>S4</u> |
| Figure S3 | (C) CV profile obtained by varying scan rates from 0.01-0.1 Vs <sup>-1</sup> at NdNbO <sub>4</sub> /f-CNF modified GCE; (F) Calibrated plot of the square root of scan rate versus anodic and cathodic peak currents; All the above experiments were performed in [Fe(CN) <sub>6</sub> ] <sup>3-/4-</sup> in 0.1 M KCl as electrolyte. | <u>S5</u> |
| Figure S4 | Plot of logarithmic scan rate versus logarithmic redox currents for 100 μmolL <sup>-1</sup> VAN at NdNbO <sub>4</sub> /f-CNF/GCE;                                                                                                                                                                                                      | <u>S5</u> |

|            |                                                                                                                                                                                                                         |           |
|------------|-------------------------------------------------------------------------------------------------------------------------------------------------------------------------------------------------------------------------|-----------|
| Figure S5  | plot of the square root of scan rate versus redox peak currents for 100 $\mu\text{molL}^{-1}$ VAN at NdNbO <sub>4</sub> /f-CNF/GCE.                                                                                     | <u>S6</u> |
| Figure S6  | (A) CV profile of NdNbO <sub>4</sub> /f-CNF/GCE performed using different GCEs: (B) corresponding plot of different GCE versus relative current.                                                                        | <u>S6</u> |
| Figure S7  | (A) CV profile of repeated measurements over NdNbO <sub>4</sub> /f-CNF/GCE; (B) corresponding plot of repetitive measurements versus observed current.                                                                  | <u>S6</u> |
| Figure S8  | (A) CV profile of 100 repeated cycles over NdNbO <sub>4</sub> /f-CNF/GCE for 100 $\mu\text{molL}^{-1}$ of VAN                                                                                                           | <u>S6</u> |
| Figure S9  | (A) DPV profile of NdNbO <sub>4</sub> /f-CNF/GCE performed in the chocolate matrix. (inset) Corresponding linear dependence plot for the concentration of VAN ( $\mu\text{molL}^{-1}$ ) vs. current ( $\mu\text{A}$ ).  | <u>S7</u> |
| Figure S10 | (A) DPV profile of NdNbO <sub>4</sub> /f-CNF/GCE performed in the Milk Shake matrix. (inset) Corresponding linear dependence plot for the concentration of VAN ( $\mu\text{molL}^{-1}$ ) vs. current ( $\mu\text{A}$ ). | <u>S7</u> |

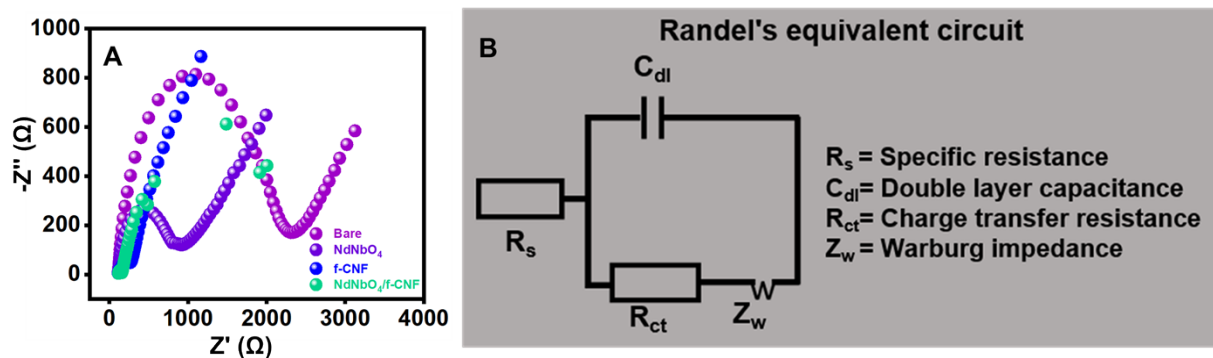

Figure S1: (A) EIS spectra obtained for unmodified GCE,  $\text{NdNbO}_4/\text{GCE}$ , f-CNF/GCE, and  $\text{NdNbO}_4/\text{f-CNF}/\text{GCE}$ ; (B) corresponding Randel's equivalent circuit for the EIS Spectra. All the above experiments were performed in  $[\text{Fe}(\text{CN})_6]^{3-/4-}$  in 0.1 M KCl as electrolyte.

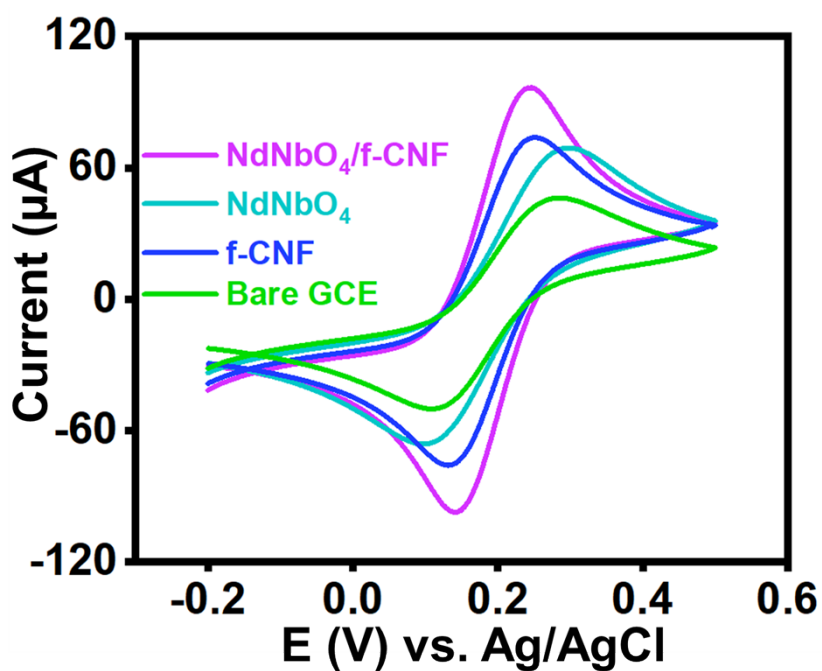

Figure S2: CV profile obtained for unmodified GCE,  $\text{NdNbO}_4/\text{GCE}$ , f-CNF/GCE, and  $\text{NdNbO}_4/\text{f-CNF}/\text{GCE}$  in  $[\text{Fe}(\text{CN})_6]^{3-/4-}$  in 0.1 M KCl as electrolyte.

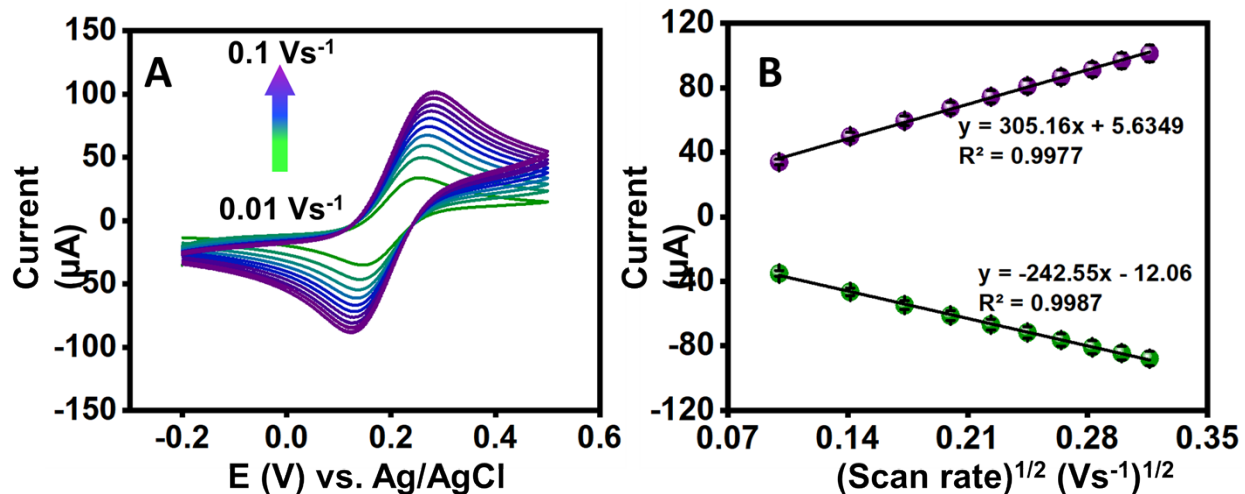

Figure S3: (C) CV profile obtained by varying scan rates from 0.01-0.1  $\text{Vs}^{-1}$  at  $\text{NdNbO}_4/\text{f-CNF}$  modified GCE; (F) Calibrated plot of the square root of scan rate versus anodic and cathodic peak currents; All the above experiments were performed in  $[\text{Fe}(\text{CN})_6]^{3-/4-}$  in 0.1 M KCl as electrolyte

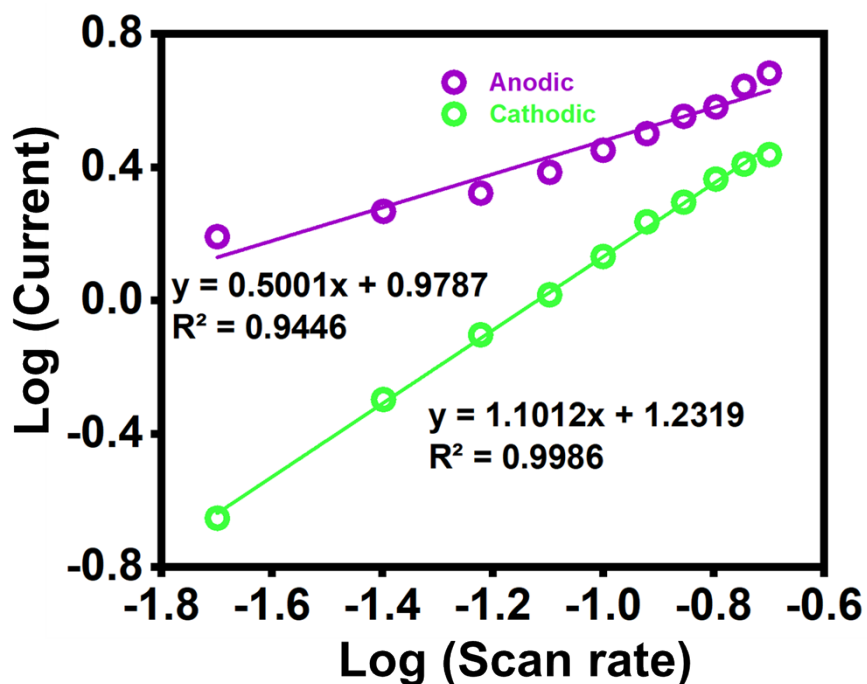

Figure S4: Plot of logarithmic scan rate versus logarithmic redox currents for  $100 \mu\text{molL}^{-1}$  VAN at  $\text{NdNbO}_4/\text{f-CNF}/\text{GCE}$ ;

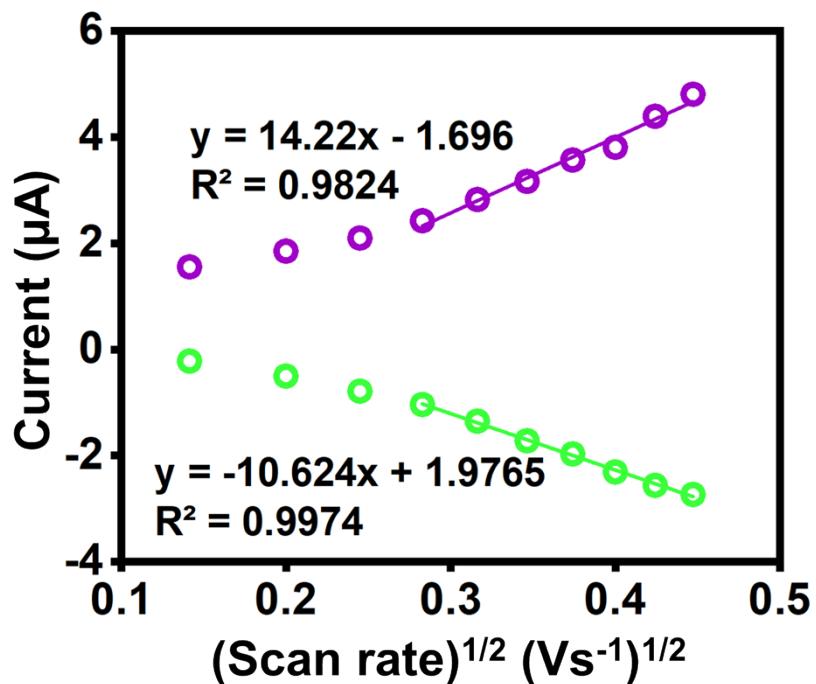

Figure S5: plot of the square root of scan rate versus redox peak currents for 100  $\mu\text{molL}^{-1}$  VAN at NdNbO<sub>4</sub>/f-CNF/GCE.

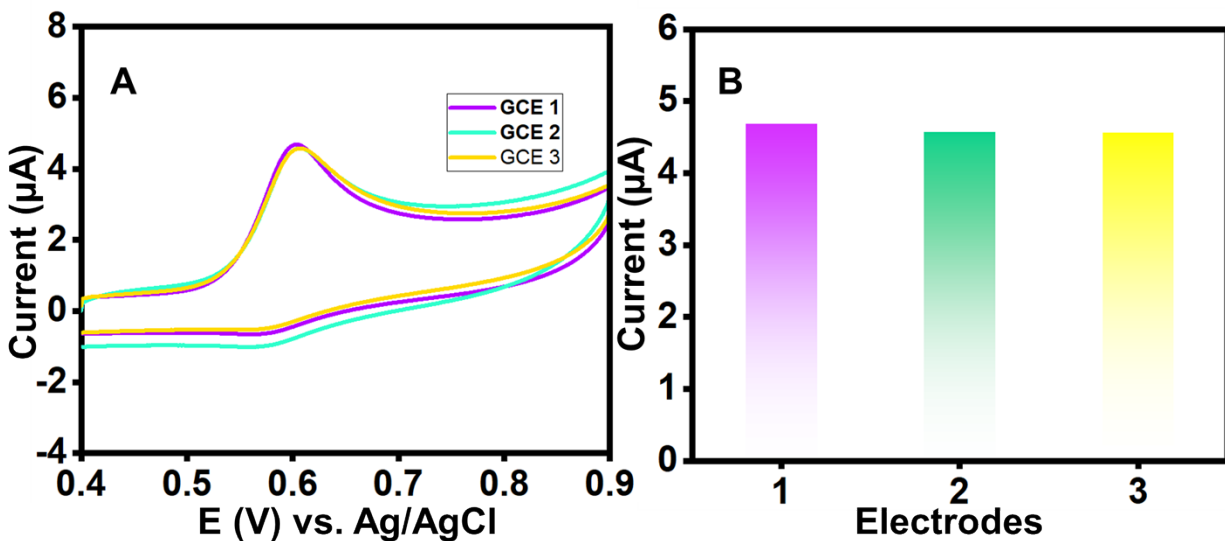

Figure S6: (A) CV profile of NdNbO<sub>4</sub>/f-CNF/GCE performed using different GCEs: (B) corresponding plot of different GCE versus relative current.

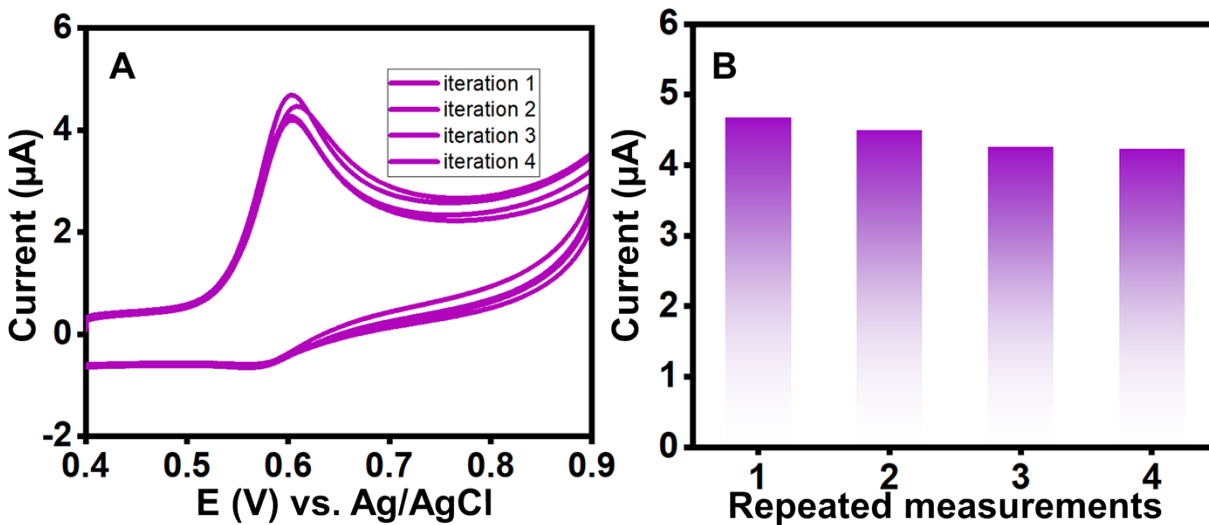

Figure S7: (A) CV profile of repeated measurements over  $\text{NdNbO}_4/\text{f-CNF}/\text{GCE}$ ; (B) corresponding plot of repetitive measurements versus observed current.

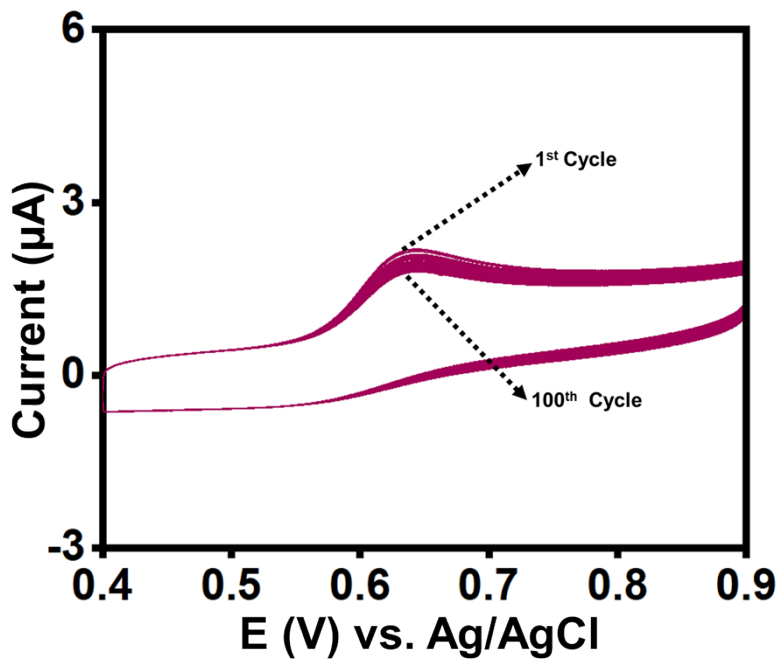

Figure S8: (A) CV profile of 100 repeated cycles over  $\text{NdNbO}_4/\text{f-CNF}/\text{GCE}$  for  $100 \mu\text{molL}^{-1}$  of VAN

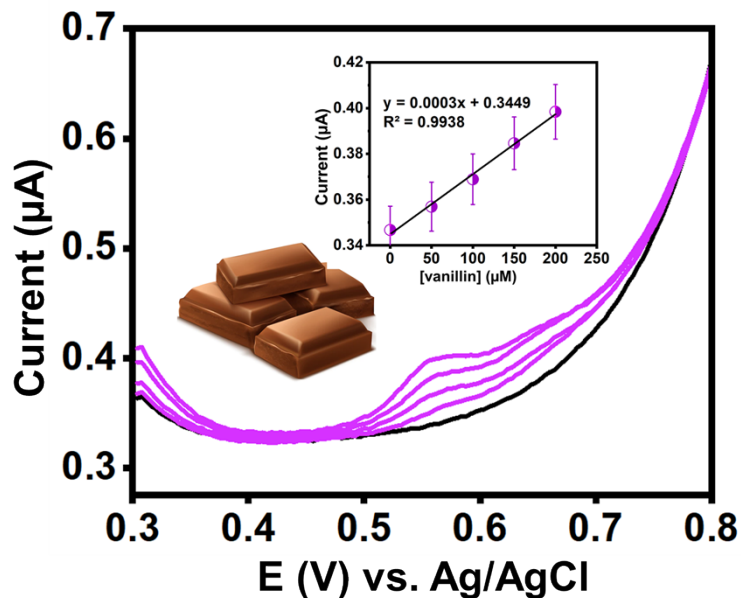

Figure S9: (A) DPV profile of  $\text{NdNbO}_4/\text{f-CNF}/\text{GCE}$  performed in the Milk chocolate matrix. (inset) Corresponding linear dependence plot for the concentration of VAN ( $\mu\text{molL}^{-1}$ ) vs. current ( $\mu\text{A}$ ).

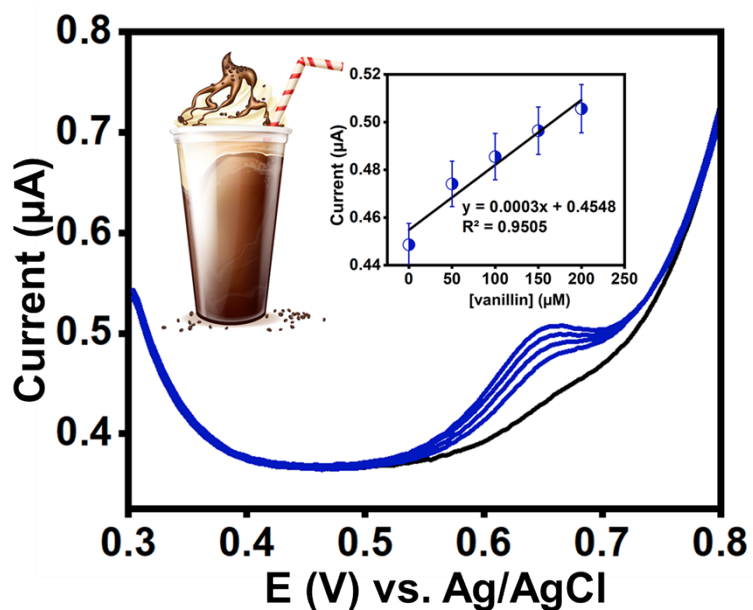

Figure S10: (A) DPV profile of  $\text{NdNbO}_4/\text{f-CNF}/\text{GCE}$  performed in the Milk Shake matrix. (inset) Corresponding linear dependence plot for the concentration of VAN ( $\mu\text{molL}^{-1}$ ) vs. current ( $\mu\text{A}$ ).
